# Supplementary material
Source: publisher figshare collection journal article supplement (https://geolsoc.figshare.com/ndownloader/files/27340144)
Supplement: Supplementary file 1 [file 27340144]

## Sheet: Table 4
Table S4 Zircon Hf isotopic data of Carboniferous clastic rocks from the Darbut region.
Samples	Age (Ma)	176Yb/177Hf	±2δ	176Lu/177Hf	±2δ	176Hf/177Hf	±2δ	176Hf/177Hfi	eHf(0)	eHf(t)	TDM(Ma)	TDMC(Ma)	fLu/Hf
Xibeikulasi Formation, sandstone xb-15
Zr.1	345	0.0229891	5.70182e-05	0.000617548	2.78241e-06	0.282998	3.01739e-05	0.282994	7.98678	15.4363	356.661	363.746	-0.981399
Zr.2	342	0.0297931	0.000848065	0.000787886	1.9077e-05	0.282874	3.11737e-05	0.282869	3.62151	10.9641	532.785	647.329	-0.976268
Zr.3	332	0.0277221	0.000772833	0.000781391	2.0936e-05	0.282853	2.98181e-05	0.282848	2.86559	9.99353	562.852	701.513	-0.976464
Zr.4	338	0.0230406	0.000218566	0.000604138	3.86879e-06	0.282991	2.87212e-05	0.282988	7.75732	15.0579	365.678	382.511	-0.981803
Zr.5	337	0.0238713	0.000108142	0.000643371	2.2487e-06	0.282876	3.36667e-05	0.282872	3.66366	10.9308	529.08	645.579	-0.980621
Zr.6	333	0.0440826	0.000682695	0.00117541	1.81741e-05	0.282878	3.55272e-05	0.282871	3.76451	10.8278	532.538	649.055	-0.964596
Zr.7	334	0.0325751	0.000248245	0.000950511	7.35865e-06	0.282916	3.61598e-05	0.28291	5.09772	12.233	475.882	560.085	-0.97137
Zr.8	334	0.0256239	0.000446233	0.00073791	1.12494e-05	0.282877	3.36675e-05	0.282872	3.70508	10.8864	528.751	646.088	-0.977774
Zr.10	343	0.03539	0.00019563	0.000993667	2.26123e-06	0.282891	3.50371e-05	0.282885	4.20402	11.5219	512.32	612.499	-0.97007
Zr.12	344	0.0314476	9.42572e-05	0.000897868	5.74398e-06	0.282822	3.75543e-05	0.282817	1.77874	9.13799	608.054	765.354	-0.972956
Zr.13	344	0.0143324	0.000337322	0.00041398	8.33287e-06	0.282896	3.52461e-05	0.282893	4.38119	11.8526	497.533	592.146	-0.987531
Zr.14	346	0.028134	8.44881e-05	0.000749483	1.974e-06	0.282883	3.91057e-05	0.282878	3.91484	11.3527	520.548	625.627	-0.977425
Zr.15	339	0.0219612	5.31145e-05	0.000606306	1.20675e-06	0.282769	3.43514e-05	0.282765	-0.118164	7.19773	678.585	885.08	-0.981738
Zr.16	327	0.0241338	0.000197538	0.000655898	6.42944e-06	0.282922	3.25582e-05	0.282918	5.31408	12.3632	463.568	546.325	-0.980244
Zr.17	330	0.0477728	0.00116992	0.00136233	3.67329e-05	0.282901	3.5256e-05	0.282893	4.56817	11.5273	502.63	602.066	-0.958966
Zr.18	345	0.040609	0.000179529	0.00115546	3.66322e-06	0.28286	3.69614e-05	0.282853	3.11279	10.4357	558.517	683.378	-0.965197
Zr.19	333	0.0209901	0.000121809	0.000578166	2.43515e-06	0.282913	3.75379e-05	0.282909	4.98135	12.1772	475.841	562.871	-0.982585
Zr.20	329	0.0223812	0.000197413	0.0006053	3.55954e-06	0.282819	4.2392e-05	0.282815	1.66588	8.76666	607.85	777.425	-0.981768
Zr.21	332	0.0203978	0.000159626	0.000569684	5.58062e-06	0.282865	3.34655e-05	0.282861	3.28195	10.4567	543.201	671.957	-0.982841
Zr.22	342	0.0277456	0.000182963	0.00074917	2.94877e-06	0.283035	3.16558e-05	0.283031	9.31587	16.6715	304.711	282.262	-0.977435
Zr.23	334	0.0392129	0.000385507	0.00110892	1.32074e-05	0.282994	3.97473e-05	0.282987	7.84419	14.9465	367.103	386.527	-0.966599
Zr.25	351	0.0621071	0.000701466	0.00196061	2.47658e-05	0.282991	4.33814e-05	0.282978	7.74058	15.0078	379.934	395.866	-0.940945
Zr.26	343	0.0282002	0.000529312	0.00074176	1.0198e-05	0.282884	4.31498e-05	0.282879	3.94436	11.3192	519.264	625.435	-0.977658
Zr.27	340	0.0270748	0.000119908	0.000698771	1.19849e-06	0.282966	3.88925e-05	0.282961	6.84711	14.1691	402.936	440.96	-0.978953
Zr.28	332	0.0423901	0.000203295	0.00110351	6.21926e-06	0.282983	4.4126e-05	0.282976	7.464	14.5245	382.398	411.981	-0.966762
Zr.29	345	0.0379252	0.000860816	0.00101294	2.65871e-05	0.282952	3.82432e-05	0.282945	6.35431	13.7122	426.14	474.08	-0.96949
Zr.30	332	0.0245403	9.27909e-05	0.000657294	1.54783e-06	0.282796	3.68276e-05	0.282792	0.857771	8.01153	640.77	827.859	-0.980202
Zr.31	332	0.0246074	0.000171104	0.000678264	2.54571e-06	0.282906	3.7051e-05	0.282901	4.72475	11.8767	487.32	581.293	-0.97957
Zr.32	334	0.0238569	0.000536365	0.00063609	1.10736e-05	0.282842	3.88702e-05	0.282838	2.4804	9.6833	575.999	722.849	-0.980841
Zr.33	341	0.0250988	0.000225877	0.000729928	3.87699e-06	0.282943	4.04591e-05	0.282938	6.0346	13.3705	435.717	492.815	-0.978014
Zr.34	333	0.0371337	0.000497787	0.00105477	8.36338e-06	0.282806	4.02931e-05	0.282799	1.18704	8.27503	634.339	811.845	-0.96823
Zr.35	336	0.0454761	0.000448167	0.00123237	1.64889e-05	0.282979	3.63494e-05	0.282971	7.32575	14.4429	389.318	420.324	-0.96288
Zr.36	333	0.0177786	0.000217665	0.000495524	7.00076e-06	0.282839	3.25619e-05	0.282836	2.36342	9.57558	578.504	728.944	-0.985075
Zr.37	331	0.0222943	0.000122445	0.000598178	4.18129e-06	0.282877	3.26832e-05	0.282873	3.6982	10.8454	527.079	646.379	-0.981983
Zr.38	329	0.0244368	5.43238e-05	0.000657462	2.33714e-06	0.282983	3.60247e-05	0.282979	7.45776	14.5514	378.144	407.92	-0.980197
Zr.39	333	0.0465452	0.000405138	0.00125196	1.41814e-05	0.282892	3.32194e-05	0.282884	4.25144	11.2982	513.949	619.024	-0.96229
Zr.40	341	0.0451166	0.00024634	0.00109524	2.65539e-06	0.282957	3.27613e-05	0.28295	6.55594	13.8098	418.946	464.727	-0.967011
Baogutu Formation, sandstone bg-21
Zr.1	325	0.0378265	0.000285831	0.00114357	7.55407e-06	0.282942	3.29563e-05	0.282935	6.02697	12.9284	440.842	508.643	-0.965555
Zr.3	325	0.0328239	0.000399433	0.000908474	1.19521e-05	0.282961	3.46715e-05	0.282956	6.69929	13.6518	411.114	462.375	-0.972636
Zr.4	325	0.0571546	0.000134393	0.00174312	6.47128e-06	0.282974	3.35579e-05	0.282963	7.13869	13.9119	402.403	445.737	-0.947496
Zr.5	325	0.0419519	0.000515199	0.00132692	1.92553e-05	0.282981	3.66741e-05	0.282972	7.37563	14.2386	388.282	424.829	-0.960033
Zr.6	327	0.0497499	0.000297149	0.00134829	8.0204e-06	0.28299	3.57842e-05	0.282982	7.72612	14.6271	374.265	401.518	-0.959389
Zr.9	343	0.0501428	0.000543206	0.00139587	1.70041e-05	0.282874	3.50765e-05	0.282865	3.60244	10.8285	542.269	656.766	-0.957956
Zr.10	328	0.0385745	0.00175535	0.00123905	4.54918e-05	0.283005	3.64314e-05	0.282998	8.2457	15.1919	352.112	366.126	-0.962679
Zr.13	336	0.0359899	0.000238866	0.00115499	6.07253e-06	0.282977	3.22913e-05	0.282969	7.2347	14.369	392.192	425.053	-0.965211
Zr.14	346	0.055135	0.00107643	0.00159621	3.05132e-05	0.282947	3.5224e-05	0.282937	6.19738	13.443	439.279	492.083	-0.951921
Zr.20	335	0.0236551	0.000419671	0.000726422	9.99079e-06	0.282921	3.79636e-05	0.282916	5.26849	12.4751	466.251	545.393	-0.97812
Zr.22	380	0.0963752	0.00136114	0.00267691	3.31431e-05	0.282956	4.30991e-05	0.282937	6.51016	14.1991	439.347	470.221	-0.91937
Zr.24	352	0.0257903	0.000105107	0.000695089	4.15265e-06	0.282928	3.11532e-05	0.282923	5.50863	13.0899	456.291	519.316	-0.979064
Zr.26	342	0.0496763	0.00115302	0.00148886	3.51843e-05	0.282866	3.86928e-05	0.282856	3.3217	10.5053	555.042	676.613	-0.955155
Zr.29	352	0.0657754	0.000174133	0.00165179	1.81347e-06	0.282992	3.54535e-05	0.282981	7.77513	15.1351	375.337	388.493	-0.950247
Zr.32	341	0.0249006	0.000155256	0.000688592	4.25802e-06	0.282893	3.53756e-05	0.282888	4.26468	11.6086	505.78	605.404	-0.979259
Zr.34	322	0.0722071	0.0016294	0.00183759	3.94361e-05	0.282931	3.91974e-05	0.28292	5.63756	12.3268	465.187	544.777	-0.944651
Zr.36	332	0.0251204	0.000269334	0.000678223	8.72912e-06	0.282898	3.861e-05	0.282894	4.46569	11.6175	497.637	597.852	-0.979572
Zr.39	346	0.0431466	0.00118689	0.00110726	2.71579e-05	0.282881	4.23765e-05	0.282873	3.83799	11.1938	528.611	635.773	-0.966649
Zr.41	342	0.0404638	6.77418e-05	0.00125986	3.75613e-06	0.282984	4.35028e-05	0.282976	7.50313	14.7418	382.416	405.871	-0.962052
Zr.43	389	0.129833	0.00309882	0.00315676	6.60067e-05	0.28268	4.42775e-05	0.282657	-3.24151	4.49831	859.756	1095.08	-0.904917
Zr.46	346	0.0336329	0.000452537	0.000895601	1.09127e-05	0.283036	3.68634e-05	0.28303	9.33155	16.74	305.267	280.997	-0.973024
Zr.48	333	0.0327212	0.000604147	0.000876584	1.37694e-05	0.282883	4.26674e-05	0.282877	3.92027	11.0496	522.085	634.896	-0.973597
Zr.49	354	0.0578033	0.000716044	0.00142648	1.53202e-05	0.283004	4.24899e-05	0.282995	8.21102	15.6662	355.304	356.051	-0.957034
Zr.55	348	0.0461754	0.000781108	0.0013162	1.85167e-05	0.282955	4.07043e-05	0.282946	6.45582	13.8082	425.493	470.282	-0.960355
Zr.56	340	0.0646548	9.08643e-05	0.00183905	2.51982e-06	0.282798	4.12258e-05	0.282786	0.906359	7.96717	659.364	836.861	-0.944607
Zr.58	374	0.0462276	7.12073e-05	0.00125423	5.28116e-06	0.282901	4.03611e-05	0.282892	4.57145	12.4893	501.041	574.8	-0.962222
Zr.60	355	0.0480992	0.000709206	0.00127888	1.59654e-05	0.28298	3.94987e-05	0.282971	7.34847	14.8588	388.883	408.52	-0.961479
Zr.61	346	0.036356	7.80323e-05	0.000962925	1.18994e-06	0.282867	4.26511e-05	0.28286	3.34257	10.7311	546.448	665.304	-0.970996
Zr.65	359	0.0667422	0.00254848	0.00167717	6.18315e-05	0.282875	3.94592e-05	0.282864	3.6437	11.1414	544.715	649.208	-0.949483
Zr.74	363	0.0353747	0.000455334	0.00108766	1.10498e-05	0.28298	4.09996e-05	0.282972	7.33809	15.0643	387.316	401.605	-0.967239
Zr.76	335	0.0575515	0.000514124	0.00164815	9.34574e-06	0.283007	4.33743e-05	0.282996	8.30367	15.308	353.642	364.155	-0.950357
Zr.79	350	0.0372472	0.000461938	0.000948745	1.30188e-05	0.28292	3.99292e-05	0.282914	5.22563	12.7046	470.726	542.384	-0.971423
Zr.83	345	0.0802778	0.000732966	0.00210149	1.22612e-05	0.282941	4.70113e-05	0.282928	5.98387	13.0928	454.212	513.695	-0.936702
Zr.85	354	0.0338361	0.000559702	0.00103423	1.90774e-05	0.282901	3.86483e-05	0.282894	4.55403	12.0983	498.805	584.229	-0.968849
Tailegula Formation, sandstone t-18
Zr.1	340	0.0638892	0.00161245	0.00179598	3.58585e-05	0.28287	3.51134e-05	0.282859	3.47676	10.5492	553.319	672.267	-0.945904
Zr.2	322	0.0854226	0.00176716	0.00245862	5.21222e-05	0.283003	3.43863e-05	0.282988	8.16046	14.7191	367.591	391.731	-0.925945
Zr.3	323	0.0557652	0.000743354	0.0014219	1.81134e-05	0.282891	3.69592e-05	0.282883	4.22343	11.0214	517.437	628.943	-0.957172
Zr.4	321	0.082781	0.00266839	0.00214898	6.25391e-05	0.283011	3.27486e-05	0.282998	8.46018	15.0644	352.009	368.836	-0.935272
Zr.6	317	0.0508739	0.00101076	0.00149519	2.57959e-05	0.282946	3.25562e-05	0.282937	6.15429	12.8115	439.837	509.901	-0.954964
Zr.7	340	0.0667956	0.000723081	0.00202532	1.78898e-05	0.282924	3.20587e-05	0.282911	5.36975	12.392	478.642	554.602	-0.938996
Zr.10	346	0.0693729	0.00157259	0.00201289	4.30669e-05	0.282967	3.60808e-05	0.282954	6.88561	14.0362	415.84	454.141	-0.939371
Zr.12	333	0.105597	0.00335038	0.00311237	0.000105907	0.282884	4.56747e-05	0.282865	3.96625	10.6026	553.038	663.445	-0.906254
Zr.13	362	0.0509987	0.000739738	0.00154149	1.98739e-05	0.282932	3.28827e-05	0.282921	5.64611	13.2408	461.117	517.456	-0.95357
Zr.14	346	0.064814	0.00150346	0.00193271	5.14814e-05	0.282932	3.59078e-05	0.282919	5.65841	12.8265	465.535	531.496	-0.941786
Zr.15	338	0.101561	0.000656778	0.00262647	1.72043e-05	0.28283	4.12228e-05	0.282813	2.05341	8.89716	625.756	776.074	-0.920889
Zr.19	323	0.0658135	0.000848196	0.00194686	2.40065e-05	0.282907	3.31172e-05	0.282895	4.76353	11.4497	502.602	601.6	-0.94136
Zr.21	339	0.0400977	0.000864673	0.00108713	2.11403e-05	0.282945	3.16808e-05	0.282938	6.10572	13.3183	437.004	494.6	-0.967255
Zr.22	318	0.0905035	0.00265486	0.00249665	7.81103e-05	0.282929	3.55799e-05	0.282914	5.55958	12.0267	476.952	560.861	-0.9248
Zr.24	326	0.0980763	0.000996172	0.00261329	2.24275e-05	0.28286	4.12075e-05	0.282844	3.11349	9.71694	581.117	714.527	-0.921286
Zr.25	341	0.0788073	0.000706445	0.00203098	1.7882e-05	0.282929	4.16531e-05	0.282916	5.55168	12.5935	471.199	542.501	-0.938826
Zr.26	334	0.0716511	0.000731047	0.00209616	2.05014e-05	0.282976	3.1371e-05	0.282963	7.21407	14.0976	403.177	440.87	-0.936863
Zr.27	358	0.067554	0.00151756	0.00171535	4.12086e-05	0.28285	4.01983e-05	0.282839	2.76088	10.2278	581.385	706.712	-0.948333
Zr.31	317	0.0739816	0.000369253	0.00189913	6.52346e-06	0.282916	4.24191e-05	0.282904	5.08012	11.6518	488.918	584.029	-0.942797
Zr.32	336	0.0379776	0.000331305	0.00116442	1.14385e-05	0.282876	3.55082e-05	0.282869	3.67296	10.8025	536.072	652.995	-0.964927
Zr.35	316	0.0868084	0.000849941	0.00238085	2.56723e-05	0.282864	3.90602e-05	0.28285	3.23933	9.6882	572.146	708.62	-0.928288
Zr.37	350	0.0750654	0.00162032	0.00215831	3.52315e-05	0.282995	4.06794e-05	0.282981	7.8785	15.0792	376.27	390.514	-0.934991
Zr.38	367	0.134136	0.00173675	0.00334427	3.68482e-05	0.282893	4.40375e-05	0.28287	4.28103	11.5418	543.202	629.88	-0.899269
Zr.39	341	0.0639682	0.000561614	0.00189011	1.51911e-05	0.283007	3.95284e-05	0.282995	8.32645	15.4021	355.039	362.811	-0.943069
Zr.41	322	0.0582886	0.000766995	0.00168751	2.14482e-05	0.283022	3.54101e-05	0.283011	8.82862	15.5521	332.479	338.37	-0.949171
Zr.42	382	0.0266849	0.000480738	0.000689304	1.40326e-05	0.282739	3.12558e-05	0.282734	-1.18121	7.04486	722.254	927.958	-0.979238
Zr.43	331	0.089429	0.000551643	0.00250725	1.57034e-05	0.282832	4.28442e-05	0.282816	2.11079	8.83843	621.294	774.405	-0.92448
Zr.44	401	0.0873911	0.00173544	0.00229751	3.84776e-05	0.282885	4.09846e-05	0.282868	3.99414	12.2085	539.458	613.719	-0.930798
Zr.45	459	0.04462	0.00116101	0.00123167	2.51261e-05	0.282871	3.65031e-05	0.28286	3.49095	13.2236	544.387	594.044	-0.962902
Zr.46	344	0.0657119	0.000729193	0.00195279	2.4002e-05	0.282819	4.36214e-05	0.282807	1.67672	8.7956	629.746	787.18	-0.941181
Zr.47	343	0.0815523	0.00190061	0.00234512	4.70487e-05	0.282893	3.82767e-05	0.282878	4.26359	11.2745	528.949	628.304	-0.929364
Zr.48	349	0.0752973	0.000951347	0.00192867	3.60816e-05	0.282959	3.47672e-05	0.282946	6.60387	13.836	426.504	469.285	-0.941907
Zr.49	334	0.0623059	0.000577986	0.00184277	1.2863e-05	0.282866	3.65424e-05	0.282854	3.3119	10.2486	560.79	686.8	-0.944495
Zr.50	348	0.0602793	0.00137458	0.00156836	3.84398e-05	0.282863	3.74719e-05	0.282853	3.23102	10.5228	559.929	680.149	-0.95276
Zr.53	320	0.0382583	0.000749387	0.000975185	1.85862e-05	0.282834	4.03499e-05	0.282828	2.19641	9.02425	592.57	754.049	-0.970627
Zr.54	320	0.0628297	0.00078955	0.00162271	2.00876e-05	0.282877	4.44244e-05	0.282867	3.6999	10.3916	541.619	666.826	-0.951123
Zr.55	321	0.0770255	0.000512028	0.00203267	1.90992e-05	0.283031	4.68432e-05	0.283019	9.15809	15.7875	321.972	322.505	-0.938775
Tailegula Formation, sedimentary tuff t-39
Zr.1	319	0.066398	0.00167253	0.00184719	3.98586e-05	0.282945	3.75358e-05	0.282934	6.10313	12.7282	446.16	516.789	-0.944362
Zr.2	318	0.05802	0.000895634	0.00170366	3.36872e-05	0.282869	3.63574e-05	0.282858	3.41456	10.0471	554.477	687.266	-0.948685
Zr.3	306	0.117319	0.00293317	0.00321207	7.51757e-05	0.28299	3.95261e-05	0.282972	7.71545	13.7942	394.472	438.49	-0.903251
Zr.4	304	0.0730128	0.0019858	0.00218684	5.9216e-05	0.282831	3.31229e-05	0.282819	2.10364	8.34504	616.124	784.992	-0.934131
Zr.5	313	0.0934852	0.000212206	0.00260675	5.03327e-06	0.282981	4.92876e-05	0.282966	7.40533	13.7488	400.865	446.837	-0.921483
Zr.6	312	0.0826895	0.000334736	0.00227884	8.60025e-06	0.282796	3.71636e-05	0.282783	0.847632	7.234	669.777	861.948	-0.93136
Zr.7	310	0.14376	0.000832636	0.00380788	1.84923e-05	0.28292	4.52162e-05	0.282898	5.24611	11.2807	508.56	602.331	-0.885305
Zr.8	311	0.0777118	0.0045027	0.00211004	0.000115558	0.282963	3.94742e-05	0.282951	6.75406	13.1587	422.402	483.037	-0.936445
Zr.9	309	0.0864634	0.000570563	0.0024839	2.22739e-05	0.282827	3.09282e-05	0.282813	1.95348	8.23704	627.456	795.737	-0.925184
Zr.10	315	0.0985331	0.00187134	0.00283157	3.26772e-05	0.282706	3.15715e-05	0.282689	-2.33802	3.99252	814.038	1070.38	-0.914712
Zr.11	309	0.0554346	0.00044809	0.00142918	7.02064e-06	0.282836	3.47057e-05	0.282828	2.25842	8.7579	597.291	762.532	-0.956952
Zr.12	315	0.0480383	0.00075108	0.00138201	2.60666e-05	0.282756	3.26506e-05	0.282748	-0.548499	6.08553	710.11	937.366	-0.958373
Zr.14	315	0.145635	0.00420173	0.00372544	0.000100445	0.282845	4.47183e-05	0.282823	2.56392	8.71148	623.409	770.137	-0.887788
Zr.15	315	0.0930958	0.00298974	0.00243141	8.07654e-05	0.282867	3.94791e-05	0.282853	3.36053	9.77846	567.891	702.088	-0.926765
Zr.16	320	0.0481698	0.000803836	0.00122796	1.92507e-05	0.282859	3.25443e-05	0.282852	3.09426	9.86918	560.348	700.161	-0.963013
Zr.18	310	0.120778	0.00518297	0.00303195	9.82406e-05	0.28272	3.94988e-05	0.282702	-1.84239	4.34653	797.685	1044.05	-0.908676
Zr.19	308	0.0629066	0.000583242	0.00167106	1.28342e-05	0.282815	3.17897e-05	0.282805	1.525	7.95357	631.133	813.028	-0.949667
Zr.20	310	0.181887	0.00130042	0.00476463	3.9542e-05	0.282948	3.96879e-05	0.28292	6.22679	12.0657	479.16	552.182	-0.856487
Zr.21	325	0.0625407	0.000730997	0.0019395	2.69424e-05	0.283001	3.83297e-05	0.282989	8.08282	14.8145	365.581	387.963	-0.941581
Zr.22	313	0.138056	0.00205395	0.00392478	6.31908e-05	0.282954	3.31524e-05	0.282931	6.45002	12.5198	457.805	525.472	-0.881784
Zr.23	310	0.0556033	0.000937045	0.00162894	3.06372e-05	0.282837	3.35879e-05	0.282828	2.30684	8.78647	598.544	761.484	-0.950936
Zr.25	316	0.19029	0.00215492	0.0051326	6.03615e-05	0.282709	4.71043e-05	0.282678	-2.23825	3.63121	865.414	1094	-0.845404
Zr.26	311	0.241196	0.00468429	0.00614755	0.000109404	0.283057	4.9918e-05	0.283021	10.0617	15.6374	320.702	324.321	-0.814833
Zr.27	312	0.0937219	0.00149627	0.00245653	3.14591e-05	0.282886	3.5125e-05	0.282871	4.02243	10.3743	540.652	661.743	-0.926008
Zr.28	314	0.0636341	0.00084826	0.00166719	3.11915e-05	0.282808	3.58415e-05	0.282798	1.26886	7.82374	641.515	825.93	-0.949784
Zr.29	313	0.065311	0.00205013	0.00170033	5.24355e-05	0.282775	3.80023e-05	0.282765	0.115534	6.6418	689.151	900.424	-0.948785
Zr.30	313	0.0586275	0.000676381	0.00159484	2.75853e-05	0.282972	3.56381e-05	0.282963	7.08101	13.6339	403.146	454.181	-0.951963
Zr.31	310	0.0751245	0.000591669	0.00186555	2.87818e-05	0.282798	2.99914e-05	0.282787	0.906732	7.33686	659.824	853.857	-0.943809
Zr.32	309	0.0571205	0.000526639	0.00149237	1.04579e-05	0.282875	3.49835e-05	0.282867	3.65885	10.1464	541.385	673.959	-0.955049
Zr.33	314	0.0416311	0.00106738	0.00105666	3.20469e-05	0.282778	3.61281e-05	0.282772	0.222609	6.90366	673.054	884.529	-0.968173
Zr.34	314	0.082335	0.00264143	0.00207863	5.97628e-05	0.283026	4.11036e-05	0.283014	8.99044	15.4651	329.335	337.701	-0.937391
Zr.35	310	0.105121	0.00156501	0.00268776	5.02725e-05	0.283004	3.72375e-05	0.282989	8.21639	14.4828	367.583	397.513	-0.919043
Zr.36	309	0.138328	0.00178735	0.00336562	3.61098e-05	0.282797	4.27318e-05	0.282778	0.889243	6.99174	688.642	875.055	-0.898626
Zr.37	314	0.0935979	0.00219957	0.00219441	4.0839e-05	0.282868	3.05009e-05	0.282855	3.38856	9.83532	563.031	697.685	-0.933903
Zr.38	313	0.0808002	0.00104582	0.00197326	3.07475e-05	0.282905	2.65145e-05	0.282893	4.6866	11.1595	506.136	612.378	-0.940564
Zr.41	308	0.048212	0.00118987	0.00144942	4.38334e-05	0.282931	3.26352e-05	0.282923	5.62655	12.1031	460.768	548.2	-0.956343
